# Supplementary material
Source: PubMed Central journal article supplement (PMC3011034)

**Supplemental Figure S1.** TEM picture showing MNP aggregate surrounded by membrane fragments (magnification 70,000x)

**Supplemental Figure S2.** MNP-NPCs on a hemacytometer grid after trypan blue staining. The deep blue-stained NPC is dead (left side); the yellowish NPC is alive (right side). Small, dark brown particles in the cells are MNPs.

**Supplemental Figure S1**

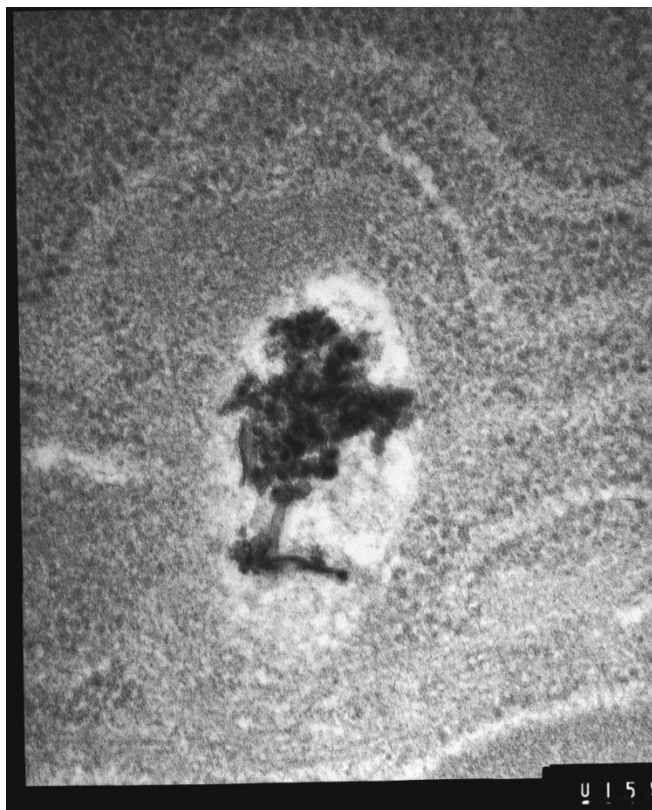

**Supplemental Figure S2**

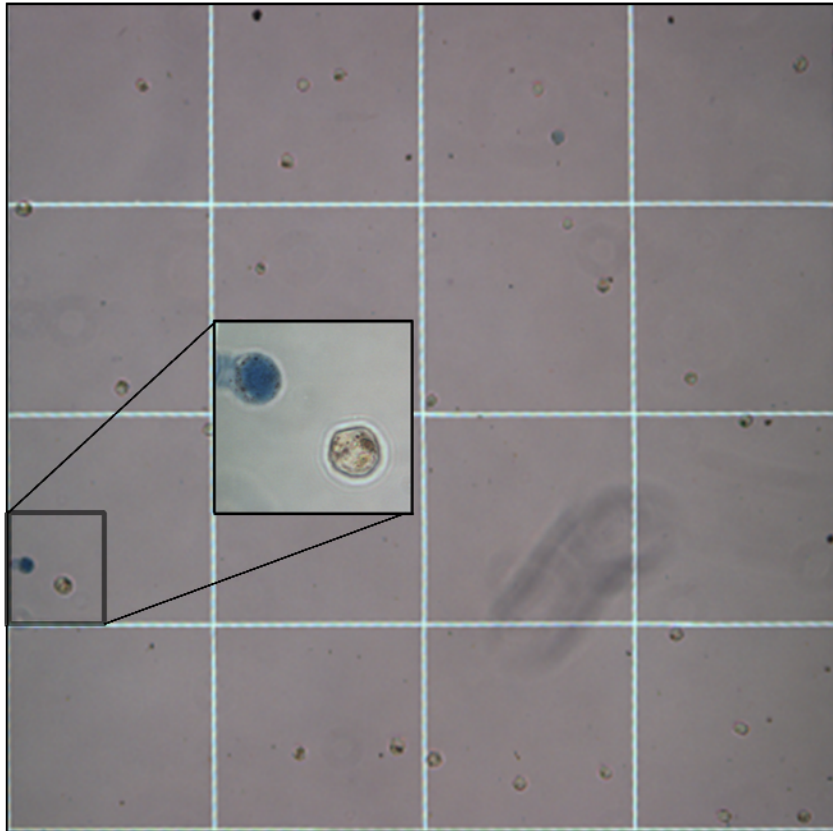

Supplement: NIHMS251431-supplement-1_si_001.pdf [file NIHMS251431-supplement-1_si_001.pdf]
